# Supplementary material for: The antimicrobial activity of tea tree oil (Melaleuca alternifolia) and its metal nanoparticles in oral bacteria
Source: PeerJ. 2024 Jun 6;12:e17241. doi: 10.7717/peerj.17241 (PMC11162611; doi:10.7717/peerj.17241)
Supplement: Supplemental Information 1 [file peerj-12-17241-s001.xlsx]

## Sheet: Sheet1
	P. gingivalis									E. faecalis									S. mutans
TTO	19.5	19.75	19	18	19.25	19.75	20.5	19.75	20.75	39	38.75	39.25	35.25	35	33.75	39.25	38.5	40	37.5	37	33.5	40.5	35.5	39.75	40	38.25	39
ZnNPs	18.5	19	18.25	18	16.75	18	17	16	16.5	25.25	25	25.25	22	22.5	23	23	24.75	25	30	27	29.75	27	27.5	28	25.25	26	27.75
FeNPs	15.5	17	15	16	16.25	16.75	18	16.5	17.75	25.5	26.25	26.75	27.5	27	25	26.5	25.25	25.25	28.5	27	27.75	26.5	28.25	27	26	25.25	24.5
Porphyromonas gingivalis
Oral b	Oral b + TTO	CHX	CHX +TTO	Flagyin	Flagyin +TTO	Amoxicillin	Amoxicillin +TTO	TTO
15	15	25.25	18.5	21.5	29.5	32	30.5	19.5
18.5	14.5	24.75	17.75	21.5	29.25	33.5	32	19.75
16.1	13.5	27.25	20	20.5	30	33.25	34	19
13	15	25.25	20.5	21.25	23.5	34	37.5	18
16	13.75	28.25	17	21.5	30.25	31	38	19.25
15.5	16	25.5	19	22	27.5	32.75	40.5	19.75
16	16.5	26.25	19	21.75	29.5	33.5	35.5	20.5
16.5	15	25.25	18	19.5	27.5	32.5	35	19.75
17	14.75	27	20	22	30	31	36.5	20.75
Enterococcus faecalis
oral b	oral b +TTO	CHX	CHX +TTO	NaCl	NaCl +TTO	Flagyin	Flagyin +TTO	Amoxicillin	Amoxicillin +TTO	TTO
17	15	24.5	13.5	15.5	11.5	0	25	17	10	39
17.5	12	24.75	14	14.25	12	0	28	17	11	38.75
16.5	13.5	23	14.5	15	12.5	0	26	18	10	39.25
17	13.5	23.25	15	14	10.75	0	27	17	11	35.25
16.5	13.5	23.5	15.75	14.75	12	0	26	18	10	35
16.5	14	24	15	14	11.5	0	28	17	10	33.75
16	14.25	26	16.5	15	13.5	0	27	17	11	39.25
17	12.5	25.5	14	15.25	13.75	0	26	18	11	38.5
17.25	12	26.25	13.75	15.25	12	0	28	18	10	40
Streptococcus mutans
Oral b	Oral b +TTO	CHX	CHX +TTO	Flagyin	Flagyin +TTO	Amoxicillin	Amoxicillin +TTO	TTO
15	15	26.5	20	0	35	22	15	37.5
15.5	13.75	26	20.5	0	35	20	12	37
15.25	15	26.5	18.75	0	35	21	15	33.5
13	15.5	27	20.25	0	35	20	17	40.5
16	14	27.5	20.5	0	35	20	15	35.5
15.5	15.5	26.25	20	0	35	20	15	39.75
16	14.25	26	19.5	0	35	22	18	40
16.5	15	27	21	0	35	22	15	38.25
16	14.75	27.25	20.5	0	35	20	15	39
